# Supplementary material for: The current and future costs of colorectal cancer attributable to red and processed meat consumption in Brazil
Source: Springer Nature journal article supplement (doi:10.1186/s12913-023-10169-4), 2023-10-31
Supplement: MOESM1 [file 26245908]

## **Additional file 1**

### **Supplementary Information**

#### **The current and future costs of colorectal cancer attributable to red and processed meat consumption in Brazil**

#### **BMC Health Services Research**

Leandro F. M. Rezende<sup>1</sup> – 0000-0003-3332-7571

Thainá Alves Malhão<sup>2</sup> - 0000-0002-5644-1089

Rafael da Silva Barbosa<sup>3</sup> - 0000-0002-9253-1487

Arthur Orlando Correa Schilithz<sup>2</sup> – 0000-0003-2457-3965

Ronaldo Corrêa Ferreira da Silva<sup>2</sup> - 0000-0002-1017-2426

Luciana Grucci Maya Moreira<sup>2</sup> - 0000-0003-1454-1732

Gerson Ferrari<sup>4</sup> - 0000-0003-3177-6576

Paula Aballo Nunes Machado<sup>2</sup> - 0000-0003-1693-5962

Maria Eduarda Leão Diogenes\*<sup>2,5</sup> - 0000-0002-4134-5860

1. Universidade Federal de São Paulo, Escola Paulista de Medicina, Departamento de Medicina Preventiva, São Paulo, Brazil.

2. Instituto Nacional de Câncer José Alencar Gomes da Silva, Coordenação de Prevenção e Vigilância, Rio de Janeiro, Brazil.

3. Universidade Federal do Espírito Santo, Programa de Pós-Graduação em Política Social, Vitória, Brazil.

4. Universidad de Santiago de Chile, Escuela de Ciencias de la Actividad Física, el Deporte y la Salud, Santiago, Chile.

5. Universidade do Estado do Rio de Janeiro, Instituto de Nutrição, Rio de Janeiro, Brazil.

\*Correspondence author: [maria.melo@inca.gov.br](mailto:maria.melo@inca.gov.br)

|                                                                                                                                                          |
|----------------------------------------------------------------------------------------------------------------------------------------------------------|
| List of Supplementary Materials                                                                                                                          |
| <b>Supplementary Material A:</b> Parameters considered in the macrosimulation model                                                                      |
| <b>Supplementary Material B:</b> 10 <sup>th</sup> revision of the International Statistical Classification of Diseases and Related Health Problems codes |
| <b>Supplementary Material C:</b> Relative risk of red and processed meat-associated cancers per exposition category and sex                              |
| <b>Supplementary Material D:</b> Hyperlinks to publicly archived datasets                                                                                |

**Supplementary Material A:** Parameters considered in the macrosimulation model

| Parameter                     | Variable                                                                                                                            | Commentary                                                                                                                                                                                                                                                                                                                                                                                                                      | Source/ Year                                                   |
|-------------------------------|-------------------------------------------------------------------------------------------------------------------------------------|---------------------------------------------------------------------------------------------------------------------------------------------------------------------------------------------------------------------------------------------------------------------------------------------------------------------------------------------------------------------------------------------------------------------------------|----------------------------------------------------------------|
| Consumption of red meat       | Prevalence data and median red meat consumption in adults $\geq 20$ years who relied exclusively on the public health system.       | We considered consumption of all types of meat from mammals, such as beef, horse, goat, lamb, mutton, and pork. We obtained the median consumption and prevalence rates for each red meat consumption category and sex. Exposition categories: $<70$ g/day (reference); $\geq 70$ to $<140$ g/day; $\geq 140$ to $<210$ g/day; $\geq 210$ to $<280$ g/day; $\geq 280$ g/day.                                                    | National Household Budget Survey – POF 2008-2009 and 2017-2018 |
| Consumption of processed meat | Prevalence data and median processed meat consumption in adults $\geq 20$ years who relied exclusively on the public health system. | We considered consumption meat preserved by smoking, curing, salting, addition of chemical preservatives (e.g., bacon, chorizo, corned beef, ham, pastrami, salami, and sausages). We obtained the median consumption and prevalence rates for each red meat consumption category and sex. Exposition categories: 0 g/day (reference); 1- $<50$ g/day; $\geq 50$ to $<100$ g/day; $\geq 100$ to $<150$ g/day; $\geq 150$ g/day. | National Household Budget Survey – POF 2008-2009 and 2017-2018 |
| Relative risk                 | Relative risk                                                                                                                       | We used the relative risks obtained from the linear dose-response meta-analysis per increment of 100 g/day of red meat consumption: 1.12 (95% CI: 1.00 to 1.25) and per increment of 50 g/day of processed meat: 1.16 (95% CI: 1.08 to 1.26). We converted                                                                                                                                                                      | WCRF/AICR systematic review reports                            |

|                        |                                                                                                            |                                                                                                                                                                                                                                                       |                                                                                          |
|------------------------|------------------------------------------------------------------------------------------------------------|-------------------------------------------------------------------------------------------------------------------------------------------------------------------------------------------------------------------------------------------------------|------------------------------------------------------------------------------------------|
|                        |                                                                                                            | these measures per increment of 1 g/day of the exposure for colorectal cancer incidence and calculated the relative risks per exposition category considering the median consumption in each category. We stratified by sex, and exposition category. |                                                                                          |
| Direct healthcare cost | Values of inpatient procedures related to cancers in adults $\geq 30$ years paid by the federal government | Federal direct healthcare costs of inpatient procedures related to cancer approved for payment in the Brazilian Unified Health System. We stratified by sex.                                                                                          | Hospital Information System of the Brazilian Unified Health System (SIH-SUS) 2008-2019   |
| Direct healthcare cost | Values of outpatient procedures related to cancer in adults $\geq 30$ years paid by the federal government | Federal direct healthcare costs of outpatient procedures related to cancer approved for payment in the Brazilian Unified Health System. We stratified by sex.                                                                                         | Ambulatory Information System of the Brazilian Unified Health System (SIA-SUS) 2008-2019 |

**Supplementary Material B:** 10<sup>th</sup> revision of the International Statistical Classification of Diseases and Related Health Problems codes

| Cancer type          | ICD-10 code                                                                         |
|----------------------|-------------------------------------------------------------------------------------|
| Colorectal           | C18, C18.0, C18.1, C18.2, C18.3, C18.4, C18.5, C18.6, C18.7, C18.8, C18.9, C19, C20 |
| All invasive cancers | C00-C97                                                                             |

**Supplementary Material C:** Relative risk of colorectal cancer per exposition category of red and processed meat consumption and sex.

| Exposition category                      | Female | Male |
|------------------------------------------|--------|------|
| <b><i>Red meat consumption</i></b>       |        |      |
| <70 g/day                                | 1.00   | 1.00 |
| $\geq 70$ to <140 g/day                  | 1.03   | 1.03 |
| $\geq 140$ to <210 g/day                 | 1.13   | 1.13 |
| $\geq 210$ to <280 g/day                 | 1.21   | 1.21 |
| $\geq 280$ g/day                         | 1.38   | 1.43 |
| <b><i>Processed meat consumption</i></b> |        |      |
| 0 g/day                                  | 1.00   | 1.00 |

|                    |      |      |
|--------------------|------|------|
| >0 to <50 g/day    | 1.09 | 1.09 |
| ≥50 to <100 g/day  | 1.20 | 1.19 |
| ≥100 to <150 g/day | 1.43 | 1.43 |
| ≥150 g/day         | 1.81 | 2.04 |

**Supplementary Material D:** Hyperlinks to publicly archived datasets.

| <b>Datasets</b>                                                                   | <b>Hyperlink</b>                                                                                                                                                                                                                                                                                                                      |
|-----------------------------------------------------------------------------------|---------------------------------------------------------------------------------------------------------------------------------------------------------------------------------------------------------------------------------------------------------------------------------------------------------------------------------------|
| Brazilian National Household Budget Survey carried out in 2008-2009 and 2017-2018 | <a href="https://www.ibge.gov.br/estatisticas/sociais/rendimento-despesa-e-consumo/9050-pesquisa-de-orcamentos-?=&amp;t=microdadosfamiliares.html?=&amp;t=microdados">https://www.ibge.gov.br/estatisticas/sociais/rendimento-despesa-e-consumo/9050-pesquisa-de-orcamentos-?=&amp;t=microdadosfamiliares.html?=&amp;t=microdados</a> |
| Ambulatory Information System of the Brazilian Unified Health System              | <a href="ftp://ftp.datasus.gov.br/dissemin/publicos/siasus/200801_/dados">ftp://ftp.datasus.gov.br/dissemin/publicos/siasus/200801_/dados</a>                                                                                                                                                                                         |
| Hospital Information System of the Brazilian Unified Health System                | <a href="ftp://ftp.datasus.gov.br/dissemin/publicos/sihsus/200801_/dados">ftp://ftp.datasus.gov.br/dissemin/publicos/sihsus/200801_/dados</a>                                                                                                                                                                                         |
